# Supplementary material
Source: HighWire-hosted journal article supplement (https://mentalhealth.bmj.com/content/22/1/10)
Supplement: inline-supplementary-material-1 [file inline-supplementary-material-1.pdf]

Table S1. Preliminary analysis: univariate models only adjusted for study-level

|                                  |               | Univariate models (N=375) |                         |       |       |
|----------------------------------|---------------|---------------------------|-------------------------|-------|-------|
|                                  |               | Odds ratio                | 95% confidence interval |       | p     |
| Age at baseline (+10 years)      |               | 1.254                     | 1.021                   | 1.541 | 0.031 |
| Age at onset (+10 years)         |               | 1.370                     | 1.126                   | 1.667 | 0.002 |
| Duration after onset (years)     |               | 0.528                     | 0.329                   | 0.848 | 0.008 |
| Woman (%)                        |               | 0.845                     | 0.555                   | 1.287 | 0.434 |
| HAM-D                            | At baseline   | 0.955                     | 0.905                   | 1.008 | 0.094 |
| Psychomotor score in HAM-D       |               | 0.926                     | 0.819                   | 1.046 | 0.217 |
| Anhedonia/melancholic (%)        |               | 1.024                     | 0.544                   | 1.928 | 0.941 |
| Duration of episode (weeks)      |               | 0.999                     | 0.995                   | 1.003 | 0.588 |
| Suicide severity                 | Low (%)       | Ref                       |                         |       |       |
|                                  | Moderate (%)  | 0.644                     | 0.386                   | 1.076 | 0.093 |
|                                  | High (%)      | 0.573                     | 0.303                   | 1.084 | 0.087 |
| Prior/recurrent episodes         | 1 (%)         | Ref                       |                         |       |       |
|                                  | 2 (%)         | 0.897                     | 0.458                   | 1.757 | 0.751 |
|                                  | 3 or more (%) | 0.481                     | 0.206                   | 1.124 | 0.091 |
| Body symptoms score in HAM-D     |               | 0.865                     | 0.746                   | 1.004 | 0.057 |
| Sleep problems score in HAM-D    |               | 0.989                     | 0.873                   | 1.122 | 0.868 |
| Any stress (%)                   |               | NA                        |                         |       |       |
| Score of stress                  |               | 0.774                     | 0.549                   | 1.090 | 0.142 |
| Poor physical functioning (%)    |               | 1.169                     | 0.753                   | 1.816 | 0.487 |
| Use of rescue medication (%)     |               | NA                        |                         |       |       |
| Inpatient (%)                    |               | 0.717                     | 0.462                   | 1.113 | 0.138 |
| Prior use of antidepressants (%) |               | 0.682                     | 0.373                   | 1.249 | 0.215 |
| Number of antidepressants        |               | 0.800                     | 0.570                   | 1.122 | 0.196 |

Table S2. Model 5: Logistic regression analysis of placebo response adjusting for HRSD at baseline

|                                   | Model 5: adjusting for HRSD at baseline<br>(n=375*) |               |       |          |
|-----------------------------------|-----------------------------------------------------|---------------|-------|----------|
|                                   | <i>OR</i>                                           | <i>95% CI</i> |       | <i>p</i> |
| Age at baseline (+10 years)       | 0.667                                               | 0.403         | 1.102 | 0.114    |
| Age at onset (+10 years)          | 1.939                                               | 1.209         | 3.111 | <0.01    |
| Time since first onset (10 years) |                                                     |               | -     |          |
| HRSD at baseline                  | 0.953                                               | 0.902         | 1.007 | 0.087    |
| Bodily symptoms                   |                                                     |               | -     |          |
| <b>Study level difference</b>     |                                                     |               |       |          |
| Duloxetine P3 trial               | 3.747                                               | 2.035         | 6.902 | <0.01    |
| Escitalopram P2 trial             | 0.892                                               | 0.519         | 1.534 | 0.680    |
| Escitalopram P3 trial             | 2.907                                               | 1.461         | 5.782 | <0.01    |
| Mirtazapine P3 trial              | Ref                                                 |               |       |          |

HRSD: Hamilton Rating Scale for Depression; OR: Odds Ratio, CI: Confidence Interval

\*Two participants were excluded from the final model because they had missing information on “age at onset”.

Table S3. The results of Hosmer-Lemeshow test

| Final model from completer analysis |                           |       |                             |
|-------------------------------------|---------------------------|-------|-----------------------------|
|                                     | Observed placebo response | %     | Predicted placebo responses |
|                                     |                           |       | Hosmer-Lemeshow p           |
| <b>1 to 10 percentile (N=38)</b>    | 11                        | 28.9% | 8.3                         |
| <b>11 to 20 percentile (N=38)</b>   | 12                        | 31.6% | 12.4                        |
| <b>21 to 30 percentile (N=38)</b>   | 9                         | 23.7% | 14.4                        |
| <b>31 to 40 percentile (N=38)</b>   | 18                        | 47.4% | 15.8                        |
| <b>41 to 50 percentile (N=38)</b>   | 21                        | 55.3% | 17.5                        |
| <b>51 to 60 percentile (N=38)</b>   | 16                        | 42.1% | 19.6                        |
| <b>61 to 70 percentile (N=38)</b>   | 22                        | 57.9% | 22.4                        |
| <b>71 to 80 percentile (N=38)</b>   | 25                        | 65.8% | 25.1                        |
| <b>81 to 90 percentile (N=38)</b>   | 27                        | 71.1% | 27.3                        |
| <b>91 to 100 percentile (N=35)</b>  | 28                        | 80.0% | 27.0                        |
| <b>Observed to predicted ratio</b>  |                           |       | 0.915                       |

The average of age at onset was used in 2 individuals.

Table S4. Logistic regression analysis of placebo response by using multiple imputation dataset

|                                      | Final model with variables selected using a criterion of $p < 0.15$ (N=440) |        |       |       |
|--------------------------------------|-----------------------------------------------------------------------------|--------|-------|-------|
|                                      | OR                                                                          | 95% CI |       | p     |
| Age at baseline (for every 10 years) | 0.706                                                                       | 0.437  | 1.141 | 0.155 |
| Age at onset (for every 10 years)    | 1.892                                                                       | 1.200  | 2.985 | <0.01 |
| Time since first onset (10 years)    | Not selected                                                                |        |       |       |
| HRSD at baseline                     | Not selected                                                                |        |       |       |
| Bodily symptoms                      | 0.857                                                                       | 0.732  | 1.003 | 0.055 |
| <b>Study level difference</b>        |                                                                             |        |       |       |
| Duloxetine P3 trial                  | 0.377                                                                       | 0.200  | 0.710 | <0.01 |
| Escitalopram P2 trial                | 1.293                                                                       | 0.639  | 2.613 | 0.475 |
| Escitalopram P3 trial                | 0.315                                                                       | 0.162  | 0.612 | <0.01 |
| Mirtazapine P3 trial                 | Ref                                                                         |        |       |       |

HRSD: Hamilton Rating Scale for Depression; OR: Odds Ratio, CI: Confidence Interval.
